# Supplementary material
Source: MDPI journal article supplement (https://www.mdpi.com/1999-4907/12/1/1)
Supplement: s1 [file s1]

## Appendix A

**Table S1.** (I)NDC reviews analysed to examine the extent of the focus on forest-water synergies.

| Title                                                                                                                                        | From                            | Year |
|----------------------------------------------------------------------------------------------------------------------------------------------|---------------------------------|------|
| The Ministerial Katowice Declaration on Forests for the Climate                                                                              | UNFCCC, COP24                   | 2019 |
| NDCs and water – Preparing to Adapt: The Untold Story of Water in Climate Change Adaptation Processes                                        | GWP                             | 2018 |
| The Bonn Challenge and the Paris Agreement: How can forest landscape restoration advance Nationally Determined Contributions? (Policy brief) | IUCN                            | 2017 |
| Mitigation & Adaptation Synergies in the NDCs                                                                                                | The Nordic Council of Ministers | 2017 |
| The agriculture sectors in the INDCs: Analysis (Working paper)                                                                               | FAO                             | 2016 |
| Analysis of Intended Nationally Determined Contributions (INDCs)                                                                             | USAID                           | 2016 |
| INDC Analysis: An overview of the forest sector                                                                                              | WWF                             | 2015 |
| Review of the integration of water within the INDCs for COP21                                                                                | FWP and Coalition Eau           | 2015 |
| Synthesis report on the aggregate effect of the intended nationally determined contributions                                                 | UNFCCC                          | 2015 |

### References:

FAO, 2016. The agriculture sectors in the Intended Nationally Determined Contributions: Analysis, by Strohmaier, R., Rioux, J., Seggel, A., Meybeck, A., Bernoux, M., Salvatore, M., Miranda, J. and Agostini, A. Environment and Natural Resources Management Working Paper No. 62. Rome

FWP and Coalition Eau, 2015. Review of the integration of water within the INDCs for COP21. French Water Partnership and Coalition Eau. <http://www.partenariat-francais-eau.fr/en/wp-content/uploads/sites/2/2016/05/2016-06- Review-of-Water-Integration-in-INDC-.pdf>

GWP, 2018. NDCs and water – Preparing to Adapt: The Untold Story of Water in Climate Change Adaptation Processes. Global Water Partnership, Emerging Insights. <https://www.gwp.org/globalassets/global/events/cop24/gwp-ndc-report.pdf>

IUCN, 2017. The Bonn Challenge and the Paris Agreement: How can forest landscape restoration advance Nationally Determined Contributions? International Union for Conservation of Nature (IUCN) Forest Brief, No. 21, 2017. [https://www.iucn.org/sites/dev/files/content/documents/20171213\\_ndcs\\_fbriief.pdf](https://www.iucn.org/sites/dev/files/content/documents/20171213_ndcs_fbriief.pdf)

The Nordic Council of Ministers, 2017. Mitigation & Adaptation Synergies in the NDCs. TemaNord 2017:524. <https://norden.diva-portal.org/smash/get/diva2:1097909/FULLTEXT01.pdf>

UNFCCC, 2019. The Ministerial Katowice Declaration on Forests for the Climate. the 24th Conference of the Parties to the United Nations Framework Convention on Climate Change. [https://cop24.gov.pl/fileadmin/user\\_upload/Ministerial\\_Katowice\\_Declaration\\_on\\_Forests\\_for\\_Climate\\_OFFICIAL\\_ENG.pdf](https://cop24.gov.pl/fileadmin/user_upload/Ministerial_Katowice_Declaration_on_Forests_for_Climate_OFFICIAL_ENG.pdf)

UNFCCC, 2015. Synthesis report on the aggregate effect of the intended nationally determined contributions. United Nations Framework Convention on Climate Change Conference of the Parties Twenty-first session. Paris, 30 November to 11 December 2015. <https://unfccc.int/resource/docs/2015/cop21/eng/07.pdf>

USAID, 2016. Analysis of Intended Nationally Determined Contributions (INDCs). United States Agency for International Development (USAID)Resources to Advance LEDS Implementation (RALI) Program.

[https://www.climatelinks.org/sites/default/files/asset/document/INDC%20White%20Paper%20-%20June%202016\\_public\\_RALI.pdf](https://www.climatelinks.org/sites/default/files/asset/document/INDC%20White%20Paper%20-%20June%202016_public_RALI.pdf)

WWF, 2015. INDC Analysis: An overview of the forest sector. By Petersen, K. and Braña Varela, J. at [www.panda.org/forestclimate](http://www.panda.org/forestclimate).

[http://d2ouvy59p0dg6k.cloudfront.net/downloads/r2\\_wwf\\_indc\\_brief.pdf](http://d2ouvy59p0dg6k.cloudfront.net/downloads/r2_wwf_indc_brief.pdf)
